# Supplementary material
Source: PubMed Central journal article supplement (PMC7673642)
Supplement: hhf-13-e007405-s003.pdf [file hhf-13-e007405-s003.pdf]

**SUPPLEMENTAL MATERIALS**

**MANAGEMENT OF ACUTE MYOCARDITIS AND CHRONIC INFLAMMATORY CARDIOMYOPATHY: AN EXPERT CONSENSUS DOCUMENT**

Ammirati et al. **Management of myocarditis**

SUPPLEMENTAL FIGURES

SUPPLEMENTAL FIGURE I.

**A**

**Masson Trichrome**

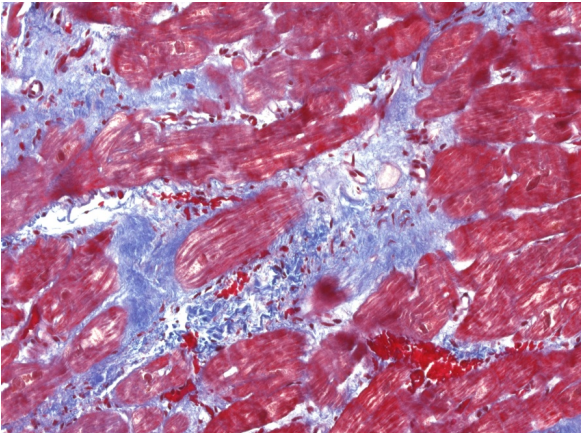

**CD3+T cells**

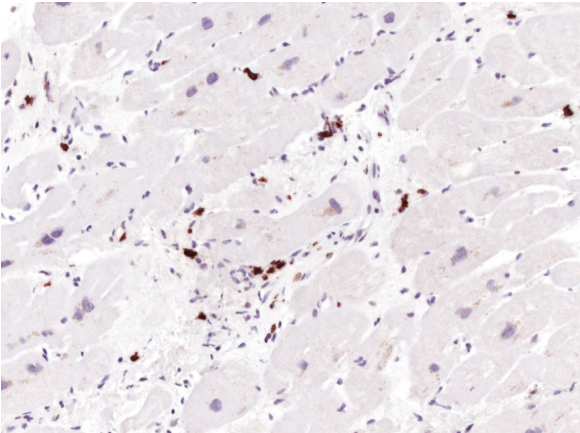

**B**

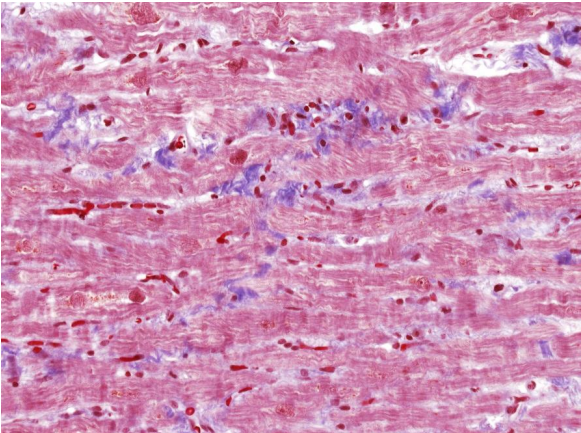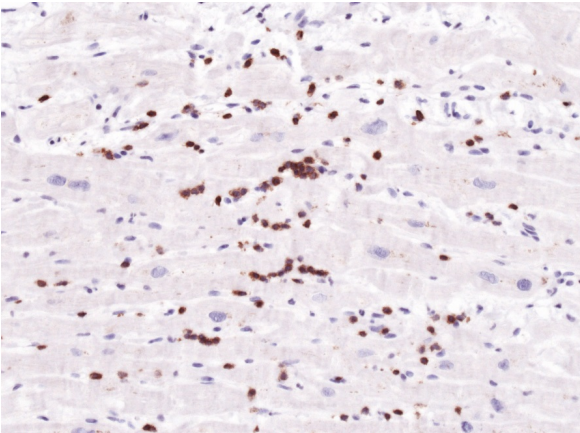

SUPPLEMENTAL FIGURE II.

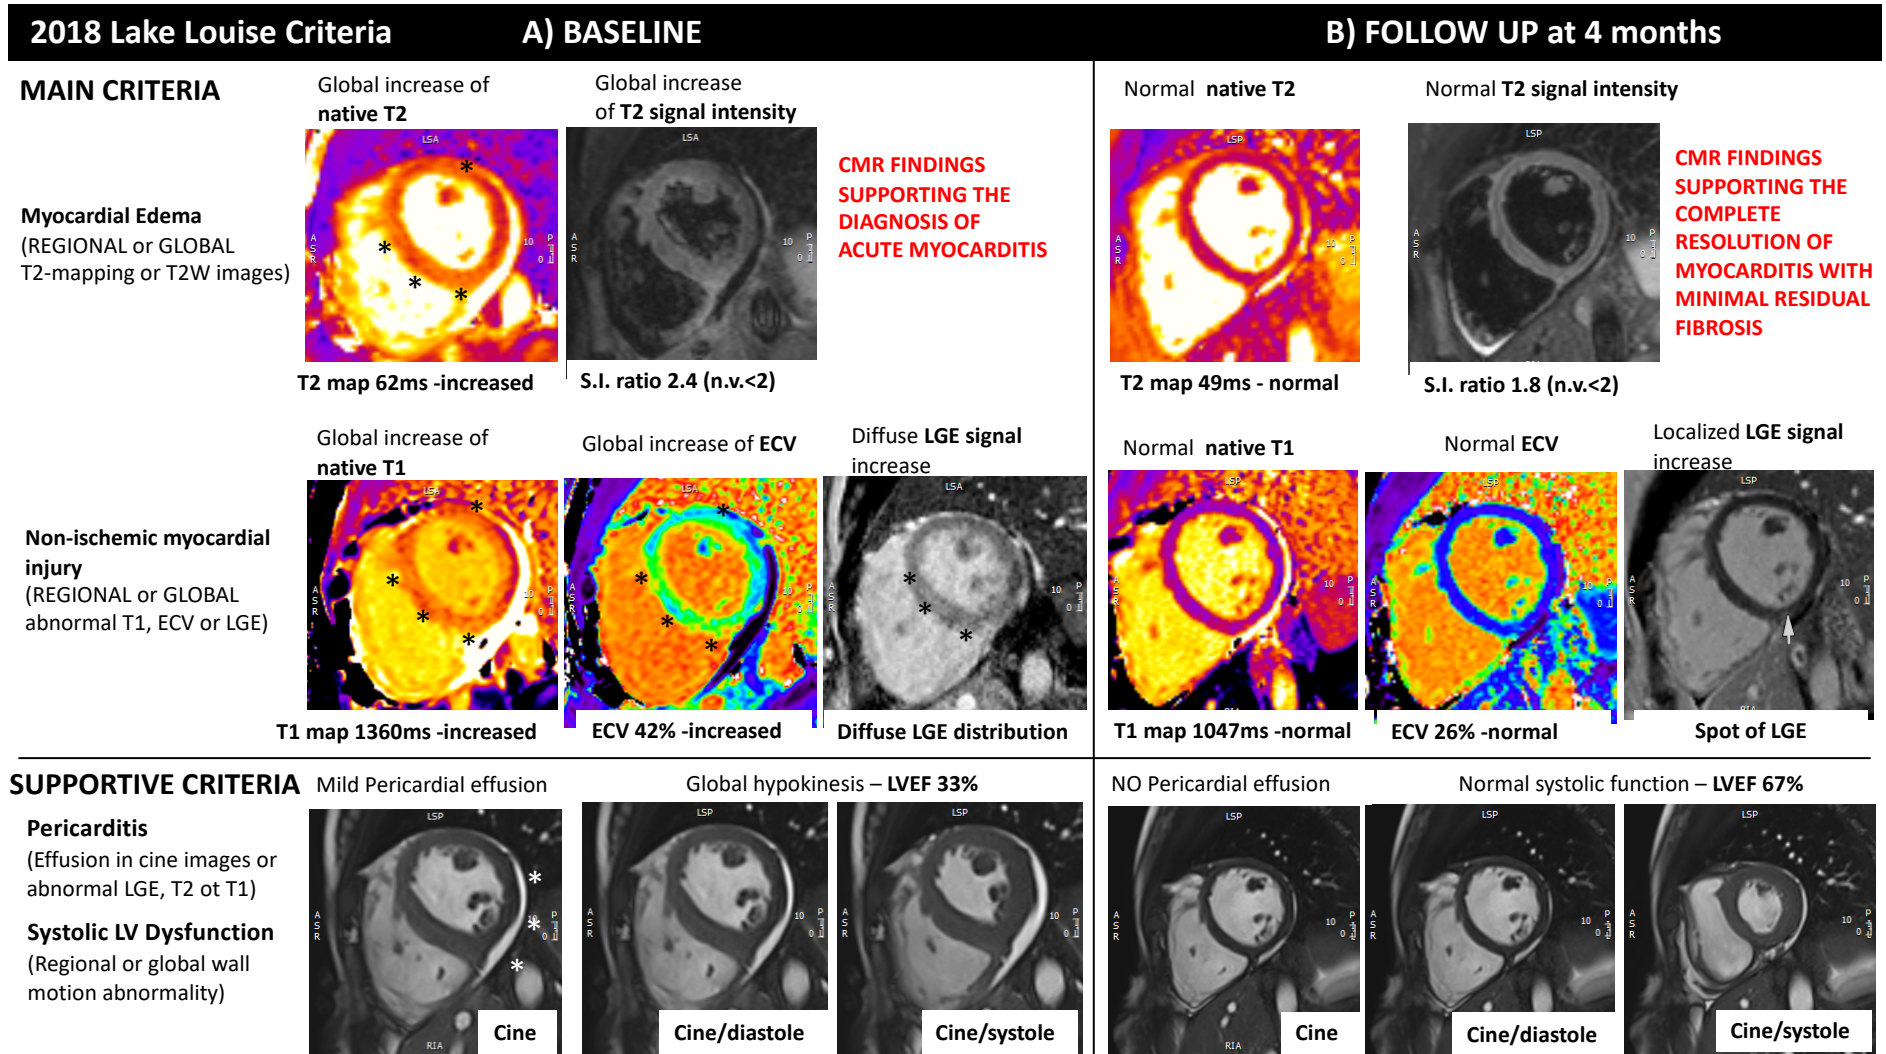

## SUPPLEMENTAL FIGURE LEGENDS:

**SUPPLEMENTAL FIGURE I. Different histological findings in chronic inflammatory cardiomyopathy vs. chronic lymphocytic myocarditis. (A) Chronic Inflammatory cardiomyopathy** in a 56-year-old man reveals significant variations of myocyte diameter (but no myocyte necrosis), interstitial and focal replacement type fibrosis with associated inflammation. **(B) Chronic lymphocytic myocarditis** in a 48-year-old woman is morphologically characterized by a diffuse interstitial fibrosis and immune cell infiltrates in absence of myocyte necrosis (Left side: Masson Trichrome stain; right side CD3+ T cell immunohistochemistry, magnitude x200).

**SUPPLEMENTAL FIGURE II. Updated cardiac magnetic resonance (CMR) criteria to support the diagnosis of acute myocarditis and to track myocardial tissue changes over time.** The images are from a 32-year old female patient admitted to hospital with fulminant myocarditis, needing inotropes and intra-aortic balloon pump during the acute phase. Endomyocardial biopsy showed diffuse lymphocytic infiltrates with myocardial necrosis. The patient was treated with methylprednisolone. CMR at 1.5 T was acquired when the patient was hemodynamically stable at baseline **(A)** within 2 weeks from the onset of cardiac symptoms and **(B)** after 4 months of follow up. In **A** main 2018 Lake Louise Criteria (LLC) criteria are fulfilled, as both signs of myocardial edema and non-ischemic inflammatory injury are present. T2-weighted (T2W) imaging shows increased T2 values at T2-mapping (T2=64 ms) and increased myocardial/skeletal muscle signal (SI) intensity ratio at STIR T2-weighted images (SI ratio=2.4). Myocardial injury is also evident based on very elevated native T1 (=1360 ms) and extracellular volume (ECV) expansion (42%); post-contrast images show global late gadolinium enhancement (LGE); all the findings are more evident in the septum (\*). Supportive criteria are also present: a small pericardial effusion is evident at cine images and there is global hypokinesia (left ventricular ejection fraction [LVEF] of 33%, see **SUPPLEMENTAL VIDEO 1**). All findings are consistent with severe global myocardial inflammation. In **B**, follow-up images at 4 months are shown. Compared to the scan acquired in the acute phase, both signs of edema and of non-ischemic injury are significantly reduced. Native T2 at T2 mapping has decreased to 49 ms and SI ratio at STIR T2-weighted images is 1.8. The values of native T1 and ECV are significantly reduced (1047 ms and 26%, respectively), and there is only a small spot of LGE (arrow) in the septum. The pericardial effusion has resolved, and ventricular function has normalized (LVEF 67%, see **SUPPLEMENTAL VIDEO 2**). Of note, wall thickness has also normalized. Increased wall thickness and mass in the acute phase can represent an indirect sign of myocardial edema. T1 and T2 mapping results should be evaluated according to CMR laboratory reference values.

**SUPPLEMENTAL TABLES:**

**Supplemental TABLE I. Autoptic series assessing the prevalence of myocarditis among sudden cardiac death in young people.**

M indicates male; N numbers; NA not available; y years.

| First Author                      | Years     | Country | N autopsy | Age; Male sex (%) | Type of population                                                   | Proportion of myocarditis | Among myocarditis Age; Male sex (%) | Death at rest vs. During effort                                                                          | Notes                                                                                                                                                                                                                                |
|-----------------------------------|-----------|---------|-----------|-------------------|----------------------------------------------------------------------|---------------------------|-------------------------------------|----------------------------------------------------------------------------------------------------------|--------------------------------------------------------------------------------------------------------------------------------------------------------------------------------------------------------------------------------------|
| Corrado et al. <sup>4</sup> 2001  | 1979-1998 | Italy   | 273       | 24y; 80% M        | Veneto Region of Italy, prospective collection of sudden deaths ≤35y | 10% (n=27)                | 21 y; 74% M                         | At rest 21 (78%), of whom 2 during sleep.<br><br>During effort in 6 (22%) of whom 3 competitive athletes | The most frequent substrate in those victims with apparently normal heart. Patchy interstitial inflammatory infiltrates in all cases. Most frequent histology: polymorphous infiltrate (59%), lymphocytic (33%) and giant cell (4%). |
| Eckart et al. <sup>119</sup> 2011 |           | USA     | 298       | 26y; 95%          | Department of Defense                                                | 5.7% (n=17)               | NA                                  | Non-exertional 12 (71%)                                                                                  | -                                                                                                                                                                                                                                    |

|                                  |           |         |                                                      |               |                                                             |                                             |                                                       |                                                                                                           |                                                                                                                                                           |
|----------------------------------|-----------|---------|------------------------------------------------------|---------------|-------------------------------------------------------------|---------------------------------------------|-------------------------------------------------------|-----------------------------------------------------------------------------------------------------------|-----------------------------------------------------------------------------------------------------------------------------------------------------------|
|                                  |           |         |                                                      |               | Cardiovascular Death Registry of sudden deaths ≤35y         |                                             |                                                       | Exertional 5 (29%)                                                                                        |                                                                                                                                                           |
| Harmon et al. <sup>5</sup> 2014  | 2004-2008 | USA     | 36                                                   | NA            | National Collegiate Athletic Association                    | 8% (n=3)                                    | NA                                                    | NA                                                                                                        | -                                                                                                                                                         |
| Maron et al. <sup>120</sup> 2016 | 1980-2011 | USA     | 842                                                  | 19y;<br>89% M | United States National Registry. Young competitive athletes | 7% (n=57)<br><br>Sarcoidosis:<br>0.5% (n=4) | 17 y;<br>81% M<br><br>Sarcoidosis:<br>26 y;<br>100% M | NA                                                                                                        | In Whites 52%; in African American 42%<br><br>Sarcoidosis:<br>In African American 75%, in Whites 25%                                                      |
| Lynge et al. <sup>121</sup> 2019 | 2000-2009 | Denmark | 753 (82% forensic autopsies; 18% hospital autopsies) | NA            | Nationwide study, deaths in people aged 1-49y               | 6% (n=42)                                   | 31 y;<br>69% M                                        | At rest 38 (91%) of whom 18 during sleep.<br><br>During activity 2 (5%), the remaining ones not specified | Diagnosis of myocarditis required confirmation by histopathology according to the Dallas criteria which includes the presence of inflammatory infiltrates |

|  |  |  |  |  |  |  |  |  |                                                                                                                                                                                                                                                   |
|--|--|--|--|--|--|--|--|--|---------------------------------------------------------------------------------------------------------------------------------------------------------------------------------------------------------------------------------------------------|
|  |  |  |  |  |  |  |  |  | <p>with/or without myocyte necrosis.</p> <p>Postmortem virology examination on myocardial tissue specimen performed in 10 (24%) with a positive result in 30% (2 cases of parvovirus B19 and one case with missing information on virus type)</p> |
|--|--|--|--|--|--|--|--|--|---------------------------------------------------------------------------------------------------------------------------------------------------------------------------------------------------------------------------------------------------|

**Supplemental TABLE II. Diagnostic targets for cardiac magnetic resonance (CMR).**

EF indicates ejection fraction; ECV, Extracellular volume; LGE, late gadolinium enhancement; LV, left ventricular; RV, right ventricular.

| Target            | Technique                                            | Recommended parameters                                                                                                                                                                        |
|-------------------|------------------------------------------------------|-----------------------------------------------------------------------------------------------------------------------------------------------------------------------------------------------|
| Global Function   | Cine CMR                                             | LV-EF, global longitudinal strain, LV stroke volume index, LV end-diastolic and systolic volume index, RV volumes and EF, RV stroke volume index, RV end-diastolic and systolic volume index, |
| Regional Function | Cine CMR                                             | Regional wall thickening, regional strain                                                                                                                                                     |
| Edema             | Water-sensitive CMR (T2 mapping, T2-weighted images) | Location and extent of edema (myocardial T2, T2 signal intensity ratio)                                                                                                                       |
| Necrosis, scar    | LGE CMR, T1 mapping                                  | Location and extent of necrosis (signal intensity in LGE images or myocardial T1)                                                                                                             |
| Diffuse fibrosis  | T1 mapping                                           | ECV, increased myocardial T1                                                                                                                                                                  |
| Pericarditis      | Cine, LGE                                            | Extent and location of pericardial inflammation (signal intensity in LGE images) and effusion (visible fluid)                                                                                 |



**Supplemental TABLE III. Expert Consensus Recommendations on Cardiac Sarcoidosis**

**Modified from Birnie et al. (Heart Rhythm. 2014;11:1305-1323).**

CMR indicates cardiac magnetic resonance; CS, cardiac sarcoidosis; ECG, electrocardiogram; FDG-PET, fluorodeoxyglucose-positron emission tomography; ICD, implantable cardioverter-defibrillator; LVEF, left ventricular ejection fraction; RVEF, right ventricular ejection fraction.

| <b>Diagnosis and Screening</b>                                                                                                                                                                                     |     |
|--------------------------------------------------------------------------------------------------------------------------------------------------------------------------------------------------------------------|-----|
| It is recommended that patients with biopsy-proven extracardiac sarcoidosis should be asked about unexplained syncope/presyncope/significant palpitations.                                                         | I   |
| It is recommended that patients with biopsy-proven extracardiac sarcoidosis should be screened for cardiac involvement with a 12-lead ECG.                                                                         | I   |
| Screening for cardiac involvement with an echocardiogram can be useful in patients with biopsy-proven extracardiac sarcoidosis.                                                                                    | IIa |
| Advanced cardiac imaging—CMR or FDG-PET—at a center with experience in CS imaging protocols can be useful in patients with one or more abnormalities detected on initial screening by symptoms/ECG/echocardiogram. | IIa |
| Screening for CS in patients <60 years of age with unexplained second-degree (Mobitz type II) or third-degree atrioventricular block can be useful.                                                                | IIa |
| Advanced cardiac imaging—CMR or FDG-PET—is not recommended for patients without abnormalities on initial screening by symptoms/ECG/echocardiogram.                                                                 | III |
| <b>Management of Conduction Abnormalities</b>                                                                                                                                                                      |     |
| Device implantation can be useful in CS patients with an indication for pacing, even if the atrioventricular block reverses transiently.                                                                           | IIa |
| Immunosuppression can be useful in CS patients with second-degree (Mobitz II) or third-degree atrioventricular block.                                                                                              | IIa |
| ICD implantation can be useful in patients with CS and an indication for permanent pacemaker implantation.                                                                                                         | IIa |
| <b>Management of Ventricular Arrhythmias</b>                                                                                                                                                                       |     |
| Assessment of myocardial inflammation with FDG-PET can be useful in CS patients with ventricular arrhythmias.                                                                                                      | IIa |

|                                                                                                                                                                                                                                                                                                                                                                                            |     |
|--------------------------------------------------------------------------------------------------------------------------------------------------------------------------------------------------------------------------------------------------------------------------------------------------------------------------------------------------------------------------------------------|-----|
| Immunosuppression can be useful in CS patients with ventricular arrhythmias and evidence of myocardial inflammation.                                                                                                                                                                                                                                                                       | IIa |
| Antiarrhythmic drug therapy can be useful in patients with ventricular arrhythmias refractory to immunosuppressive therapy.                                                                                                                                                                                                                                                                | IIa |
| Catheter ablation can be useful in patients with CS and ventricular arrhythmias refractory to immunosuppressive <i>AND</i> antiarrhythmic therapy.                                                                                                                                                                                                                                         | IIa |
| <b>Risk Stratification for Sudden Cardiac Death</b>                                                                                                                                                                                                                                                                                                                                        |     |
| An electrophysiological study for the purpose of sudden death risk stratification may be considered in patients with LVEF >35%, despite optimal medical therapy and a period of immunosuppression (if there is active inflammation).                                                                                                                                                       | IIb |
| CMR for the purpose of sudden death risk stratification may be considered.                                                                                                                                                                                                                                                                                                                 | IIb |
| <b>Implantable Cardioverter-Defibrillator Implantation</b>                                                                                                                                                                                                                                                                                                                                 |     |
| Spontaneous sustained ventricular arrhythmias, including prior cardiac arrest.                                                                                                                                                                                                                                                                                                             | I   |
| LVEF ≤35% despite optimal medical therapy and a period of immunosuppression (if there is active inflammation).                                                                                                                                                                                                                                                                             | I   |
| ICD implantation can be useful in patients with CS, independent of ventricular function and one or more of the following:<br><br><ol style="list-style-type: none"> <li>1. An indication for permanent pacemaker implantation;</li> <li>2. Unexplained syncope or near-syncope, felt to be arrhythmic in etiology; and</li> <li>3. Inducible sustained ventricular arrhythmias.</li> </ol> | IIa |
| ICD implantation may be considered in patients with LVEF 36-49% and/or RVEF <40%, despite optimal medical therapy for heart failure and a period of immunosuppression (if there is active inflammation).                                                                                                                                                                                   | IIb |

## **SUPPLEMENTAL REFERENCES 101-121**

101. Reiff C, Missov E. A Case of Fulminant Lymphocytic Myocarditis Responsive to Immunosuppression. *Am J Med* 2018;131:e465-e466.
102. Drucker NA, Colan SD, Lewis AB et al. Gamma-globulin treatment of acute myocarditis in the pediatric population. *Circulation* 1994;89:252-257.
103. Chou HW, Wang CH, Lin LY, Chi NH, Chou NK, Yu HY, Chen YS. Prognostic Factors for Heart Recovery in Adult Patients With Acute Fulminant Myocarditis and Cardiogenic Shock Supported With Extracorporeal Membrane Oxygenation. *J Crit Care.* 2020;57:214-219.
104. Berman H, Rodriguez-Pinto I, Cervera R et al. Rituximab use in the catastrophic antiphospholipid syndrome: descriptive analysis of the CAPS registry patients receiving rituximab. *Autoimmun Rev* 2013;12:1085-1090.
105. Castellanos-Moreira R, Rodriguez-Garcia S, Lopez-Sobrino T, Capdevila A, Prieto-Gonzalez S, Espinosa G. Successful Extracorporeal Membrane Oxygenation in a Patient With Fulminant Lupus Myocarditis. *Rev Esp Cardiol (Engl Ed)* 2017;70:1013-1014.
106. Jain V, Mohebtash M, Rodrigo ME, Ruiz G, Atkins MB, Barac A. Autoimmune Myocarditis Caused by Immune Checkpoint Inhibitors Treated With Antithymocyte Globulin. *J Immunother* 2018;41:332-335.
107. Esfahani K, Buhlaiga N, Thebault P, Lapointe R, Johnson NA, Miller WH, Jr. Alemtuzumab for Immune-Related Myocarditis Due to PD-1 Therapy. *N Engl Med.* 2019;380:2375-2376.
108. Salem JE, Allenbach Y, Vozy A, Brechot N, Johnson DB, Moslehi JJ and Kerneis M. Abatacept for Severe Immune Checkpoint Inhibitor-Associated Myocarditis. *N Engl Med.* 2019;380:2377-2379.
109. Courand PY, Croisille P, Khouatra C, Cottin V, Kirkorian G, Bonnefoy E. Churg-Strauss syndrome presenting with acute myocarditis and cardiogenic shock. *Heart Lung Circ.* 2012;21:178-181.
110. Gotlib J, Cools J, Malone JM, 3rd, Schrier SL, Gilliland DG, Coutre SE. The FIP1L1-PDGFRalpha fusion tyrosine kinase in hypereosinophilic syndrome and chronic eosinophilic leukemia: implications for diagnosis, classification, and management. *Blood* 2004;103:2879-2891.
111. Kuenzli E, Neumayr A, Chaney M, Blum J. Toxocariasis-associated cardiac diseases--A systematic review of the literature. *Acta Trop* 2016;154:107-120.
112. Syed FF, Bleeker JS, Glockner J, Pardanani A, Cooper LT, Jr. Response to alemtuzumab in FIP1L1/PDGFRalpha-negative hypereosinophilic myocarditis on serial cardiac magnetic resonance imaging. *J Am Coll Cardiol.* 2012;59:430.

113. Ammirati E, Oliva F, Belli O, Bonacina E, Pedrotti P, Turazza FM, Roghi A, Paino R, Martinelli L and Frigerio M. Giant cell myocarditis successfully treated with antithymocyte globuline and extracorporeal membrane oxygenation for 21 days. *J Cardiovasc Med*. 2016;17 Suppl 2:e151-e153.
114. Suarez-Barrientos A, Wong J, Bell A, Lyster H, Karagiannis G and Banner NR. Usefulness of Rabbit Anti-thymocyte Globulin in Patients With Giant Cell Myocarditis. *Am J Cardiol*. 2015;116:447-451.
115. Ma JI, Ammirati E, Brambatti M, Adler, E. Biventricular intravascular microaxial blood pumps and immunosuppressio as a bridge to recovery in giant cell myocarditis. *J Am Coll Cardiol Case Rep*. 2020;2:1484-1488
116. Evans JD, Pettit SJ, Goddard M, Lewis C, Parameshwar JK. Alemtuzumab as a novel treatment for refractory giant cell myocarditis after heart transplantation. *J Heart Lung Transplant*. 2016;35:256-8.
117. Birnie D, Beanlands RSB, Nery P et al. Cardiac Sarcoidosis multi-center randomized controlled trial (CHASM CS- RCT). *Am Heart J*. 2019;220:246-252.
118. Harper LJ, McCarthy M, Ribeiro Neto ML et al. Infliximab for Refractory Cardiac Sarcoidosis. *Am J Cardiol*. 2019;124:1630-1635.
119. Eckart RE, Shry EA, Burke AP, McNear JA, Appel DA, Castillo-Rojas LM, Avedissian L, Pearse LA, Potter RN, Tremaine L, Gentlesk PJ, et al. and Department of Defense Cardiovascular Death Registry G. Sudden death in young adults: an autopsy-based series of a population undergoing active surveillance. *J Am Coll Cardiol*. 2011;58:1254-61.
120. Maron BJ, Haas TS, Ahluwalia A, Murphy CJ and Garberich RF. Demographics and Epidemiology of Sudden Deaths in Young Competitive Athletes: From the United States National Registry. *Am J Med*. 2016;129:1170-1177.
121. Lynge TH, Nielsen TS, Gregers Winkel B, Tfelt-Hansen J and Banner J. Sudden cardiac death caused by myocarditis in persons aged 1-49 years: a nationwide study of 14 294 deaths in Denmark. *Forensic Sci Res*. 2019;4:247-256.
